# Supplementary material
Source: Springer Nature journal article supplement (https://www.springermedizin.de/resource/supplementary/12943_2010_831_MOESM7_ESM.pdf/9554936)

**A.**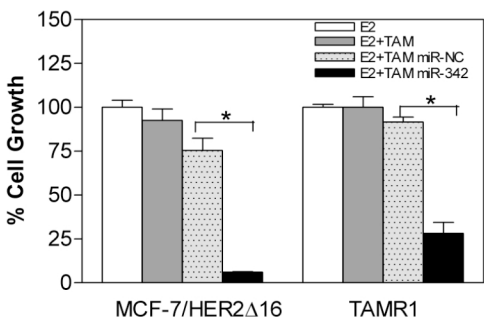**B.**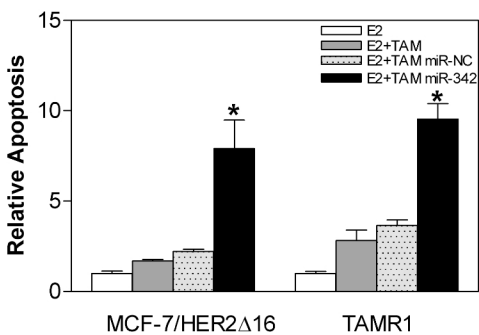**C.**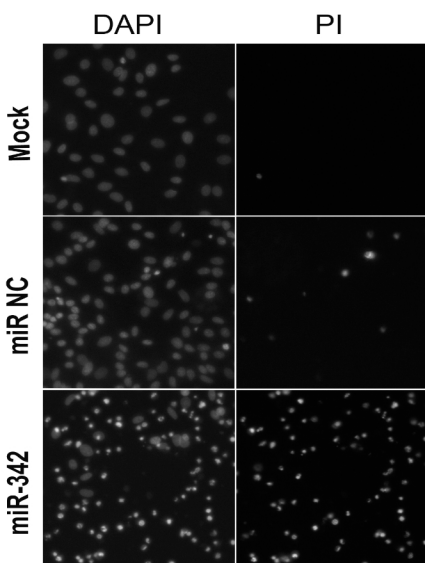

Supplement: MOESM7 [file 9554936]
